# Supplementary figures and images for: Diversity, phylogenetic distribution, and origins of venomous catfishes
Source: Springer Nature journal article supplement (doi:10.1186/1471-2148-9-282), 2009-01-01

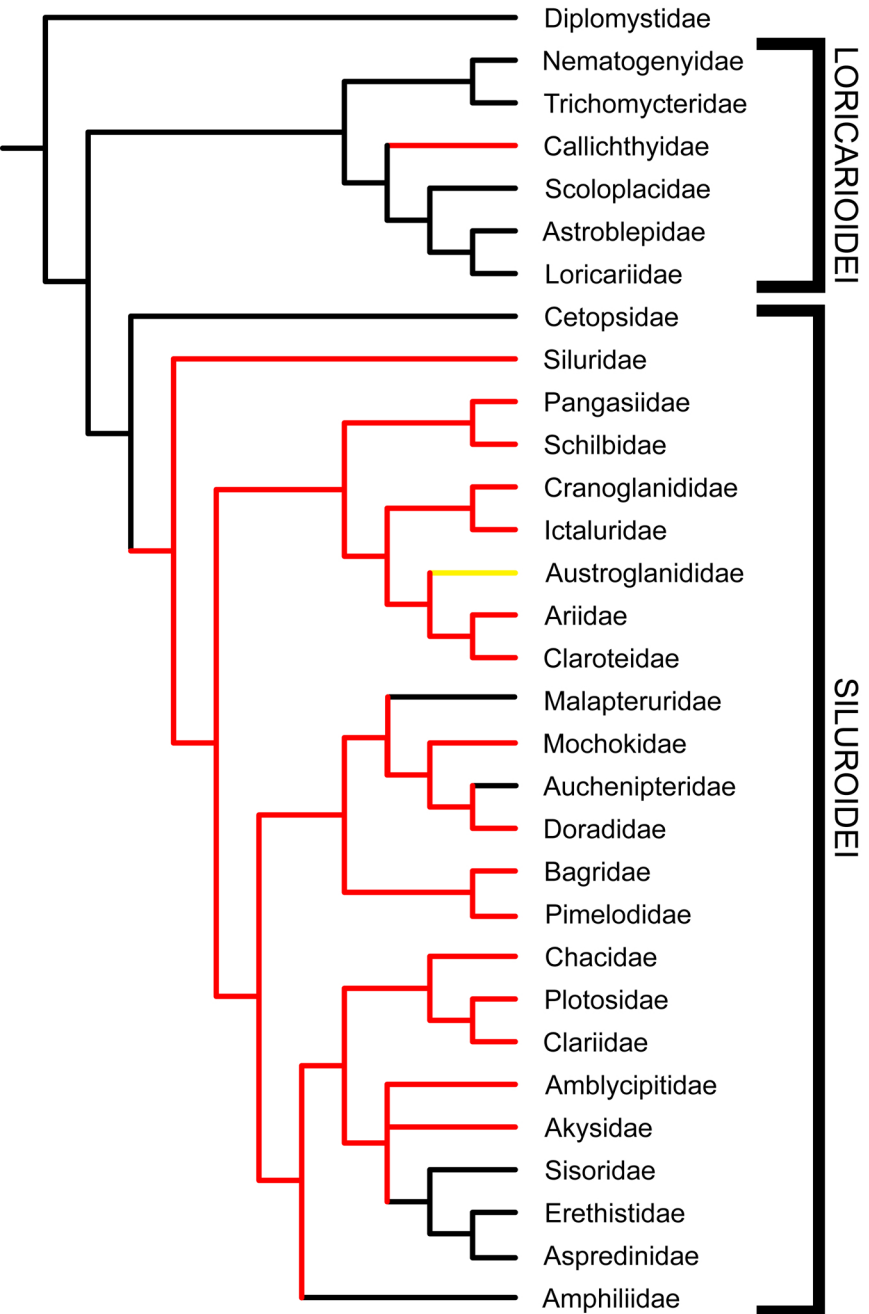

Supplement: 12862_2009_1196_MOESM5_ESM.pdf [file 12862_2009_1196_MOESM5_ESM.pdf]

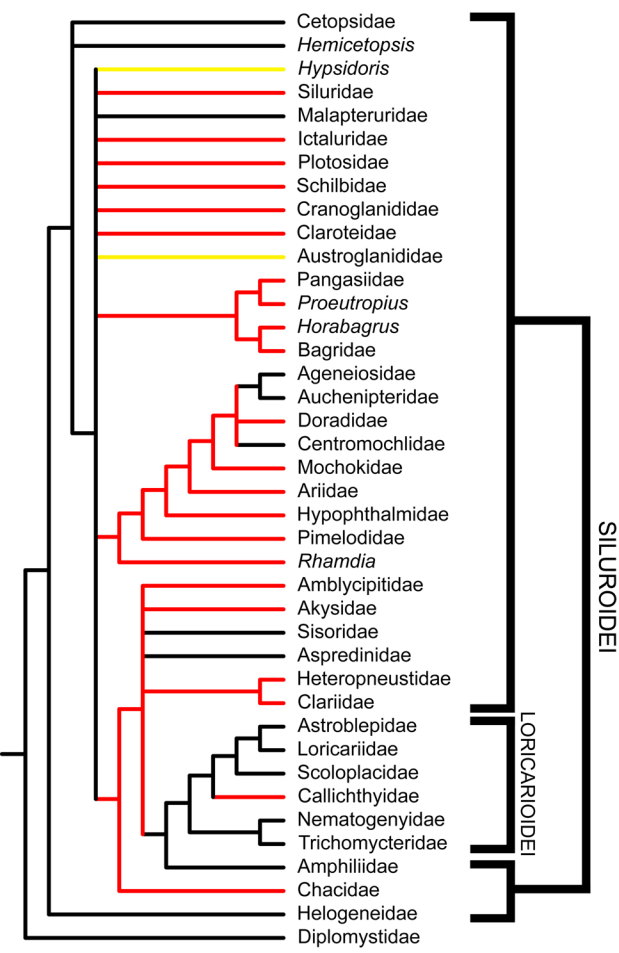

Supplement: 12862_2009_1196_MOESM6_ESM.pdf [file 12862_2009_1196_MOESM6_ESM.pdf]

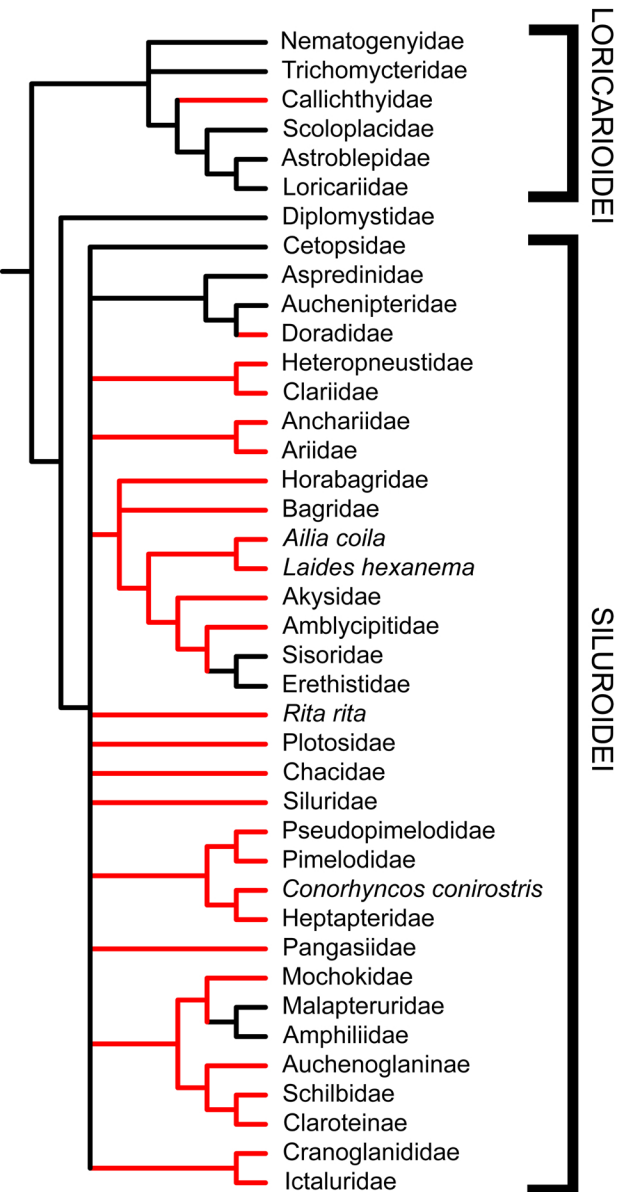

Supplement: 12862_2009_1196_MOESM7_ESM.pdf [file 12862_2009_1196_MOESM7_ESM.pdf]
